# Supplementary material for: Identification of genes associated with ricinoleic acid accumulation in Hiptage benghalensis via transcriptome analysis
Source: Biotechnol Biofuels. 2019 Jan 21;12:16. doi: 10.1186/s13068-019-1358-2 (PMC6340187; doi:10.1186/s13068-019-1358-2)
Supplement: Supplementary file 13 — Additional file 13: Table S8. Expression level correlations between FPKM and 2−ΔΔCt. [file 13068_2019_1358_MOESM13_ESM.xlsx]

## Sheet: Sheet1
Additional file 13: Table S8. Expression level correlations between FPKM and 2-ΔΔCt.
	ACBP6	ACC	ACP1	ACP4	EAR	KASII	LPCAT1	OLE3	OLE2	PAT1	PDAT2	PXG2	SAD	T01. PB56289	T01. PB57114	T01. PB6000	WRI1	FAH12-2
ACBP6	0.98	0.98	0.92	0.88	0.9	0.99	0.94	0.91	0.88	-0.7	0.96	0.79	0.99	0.16	-0.4	0.97	0.96	0.72
ACC	0.92	0.99	0.99	0.99	0.97	0.95	0.99	0.77	0.76	-0.46	0.85	0.56	0.93	-0.02	-0.15	0.93	1	0.46
ACP1	0.97	0.99	0.97	0.94	0.96	0.98	0.98	0.83	0.81	-0.58	0.91	0.69	0.98	0.03	-0.26	0.94	0.99	0.62
ACP4	0.91	0.97	0.95	0.94	0.92	0.95	0.97	0.86	0.85	-0.6	0.91	0.65	0.93	0.16	-0.32	0.97	0.98	0.53
EAR	0.77	0.87	0.92	0.96	0.91	0.8	0.87	0.45	0.45	-0.06	0.56	0.24	0.76	-0.38	0.25	0.71	0.89	0.17
KASII	0.97	0.97	0.89	0.86	0.85	0.99	0.91	0.94	0.92	-0.74	0.98	0.82	0.97	0.25	-0.47	0.99	0.94	0.74
LPACT1	0.95	0.99	0.97	0.97	0.94	0.98	0.97	0.82	0.82	-0.54	0.89	0.64	0.95	0.05	-0.24	0.96	0.99	0.54
OLE3	0.52	0.47	0.3	0.26	0.23	0.56	0.38	0.89	0.9	-0.96	0.8	0.85	0.53	0.87	-0.96	0.72	0.41	0.73
OLE2	0.89	0.88	0.75	0.73	0.7	0.92	0.79	0.99	0.99	-0.85	0.99	0.9	0.9	0.46	-0.66	0.98	0.83	0.79
PAT1	-0.26	-0.21	-0.09	-0.02	-0.06	-0.29	-0.21	-0.68	-0.69	0.88	-0.6	-0.66	-0.3	-0.91	0.93	-0.48	-0.2	-0.55
PDAT2	0.74	0.69	0.55	0.5	0.49	0.77	0.62	0.98	0.98	-0.97	0.94	0.92	0.75	0.7	-0.86	0.88	0.64	0.81
PXG2	0	-0.11	-0.29	-0.35	-0.35	0.02	-0.2	0.48	0.49	-0.77	0.35	0.6	0.01	0.93	-0.94	0.19	-0.18	0.54
SAD	0.92	0.89	0.78	0.74	0.74	0.93	0.83	0.99	0.97	-0.87	1	0.91	0.93	0.43	-0.65	0.97	0.85	0.82
T01.PB56289	-0.08	-0.13	-0.29	-0.32	-0.34	-0.04	-0.18	0.44	0.47	-0.71	0.31	0.47	-0.06	0.98	-0.91	0.19	-0.17	0.36
T01.PB57114	-0.25	-0.22	-0.13	-0.05	-0.12	-0.27	-0.25	-0.63	-0.63	0.83	-0.57	-0.6	-0.31	-0.82	0.84	-0.45	-0.23	-0.51
T01.PB6000	0.42	0.45	0.32	0.31	0.25	0.5	0.41	0.81	0.85	-0.84	0.74	0.66	0.44	0.88	-0.87	0.71	0.42	0.48
WRI1	0.97	0.96	0.89	0.86	0.86	0.98	0.92	0.94	0.92	-0.74	0.98	0.82	0.97	0.25	-0.47	0.99	0.94	0.73
FAH12-2	0.04	-0.15	-0.32	-0.42	-0.36	-0.01	-0.25	0.38	0.36	-0.7	0.27	0.63	0.04	0.7	-0.82	0.07	-0.23	0.67
